# Supplementary material for: Do difficulties in accessing in-hours primary care predict higher use of out-of-hours GP services? Evidence from an English National Patient Survey
Source: PubMed Central journal article supplement — Emerg Med J. 2014 May 21;32(5):373–8. doi: 10.1136/emermed-2013-203451 (PMC4413677; doi:10.1136/emermed-2013-203451), 2014-05-21
Supplement: emermed-2013-203451-s1.pdf [file emermed-2013-203451-s1.pdf]

## Appendices

### Appendix 1: Derivation of exposure variables from the General Practice Patient Survey

| Access factor                                     | Conditioning Question(s)                                                                                                                                                                                                                                                                                                                                                                                                                                                                                                                                                                                                                                                                                                                                                                                                                                                                                                                                                                                                                                                                        | Final Outcome Question                                                                                                                                                                                                                                                                                                                                                                    |
|---------------------------------------------------|-------------------------------------------------------------------------------------------------------------------------------------------------------------------------------------------------------------------------------------------------------------------------------------------------------------------------------------------------------------------------------------------------------------------------------------------------------------------------------------------------------------------------------------------------------------------------------------------------------------------------------------------------------------------------------------------------------------------------------------------------------------------------------------------------------------------------------------------------------------------------------------------------------------------------------------------------------------------------------------------------------------------------------------------------------------------------------------------------|-------------------------------------------------------------------------------------------------------------------------------------------------------------------------------------------------------------------------------------------------------------------------------------------------------------------------------------------------------------------------------------------|
| Telephone access                                  |                                                                                                                                                                                                                                                                                                                                                                                                                                                                                                                                                                                                                                                                                                                                                                                                                                                                                                                                                                                                                                                                                                 | Q3 – Generally, how easy is it to get through to someone at your GP surgery on the phone? <ul style="list-style-type: none"> <li><input type="checkbox"/> Very easy</li> <li><input type="checkbox"/> Fairly easy</li> <li><input type="checkbox"/> Not very easy</li> <li><input type="checkbox"/> Not at all easy</li> <li><input type="checkbox"/> Haven't tried</li> </ul>            |
| Continuity of care                                | Q8a – Is there a particular GP you usually prefer to see or speak to? <ul style="list-style-type: none"> <li><input checked="" type="checkbox"/> Yes</li> <li><input type="checkbox"/> No ... Go to Q10</li> <li><input type="checkbox"/> There is usually only one GP in my GP surgery ... Go to Q10</li> </ul>                                                                                                                                                                                                                                                                                                                                                                                                                                                                                                                                                                                                                                                                                                                                                                                | Q9 – How often do you see or speak to the GP you prefer? <ul style="list-style-type: none"> <li><input type="checkbox"/> Always or almost always</li> <li><input type="checkbox"/> A lot of the time</li> <li><input type="checkbox"/> Some of the time</li> <li><input type="checkbox"/> Never or almost never</li> <li><input type="checkbox"/> Not tried at this GP surgery</li> </ul> |
| Ability to get an urgent appointment when desired | Q10 – Last time you wanted to see or speak to a GP or nurse from your GP: What did you want to do? (See a GP at the surgery) <ul style="list-style-type: none"> <li><input checked="" type="checkbox"/> See a GP at the surgery</li> <li><input type="checkbox"/> See a nurse at the surgery</li> <li><input type="checkbox"/> Speak to a GP on the phone</li> <li><input type="checkbox"/> Speak to a nurse on the phone</li> <li><input type="checkbox"/> Have someone visit me at my home</li> <li><input type="checkbox"/> I didn't mind/ wasn't sure what I wanted</li> </ul> Q11 – And when did you want to see or speak to them? (On the same day, on the next working day) <ul style="list-style-type: none"> <li><input checked="" type="checkbox"/> On the same day</li> <li><input checked="" type="checkbox"/> On the next working day</li> <li><input type="checkbox"/> A few days later</li> <li><input type="checkbox"/> A week or more later</li> <li><input type="checkbox"/> I didn't have a specific day in mind</li> <li><input type="checkbox"/> Can't remember</li> </ul> | Q12 – Were you able to get an appointment to see or speak to someone? <ul style="list-style-type: none"> <li><input type="checkbox"/> Yes</li> <li><input type="checkbox"/> Yes, but I had to call back closer to or on the day I wanted the appointment</li> <li><input type="checkbox"/> No ... Go to Q16</li> <li><input type="checkbox"/> Can't remember ... Go to 18</li> </ul>      |
| Ability to get a routine appointment when desired | What did you want to do? (See a GP at the surgery) <ul style="list-style-type: none"> <li><input checked="" type="checkbox"/> See a GP at the surgery</li> <li><input type="checkbox"/> See a nurse at the surgery</li> <li><input type="checkbox"/> Speak to a GP on the phone</li> <li><input type="checkbox"/> Speak to a nurse on the phone</li> <li><input type="checkbox"/> Have someone visit me at my home</li> <li><input type="checkbox"/> I didn't mind/ wasn't sure what I wanted</li> </ul> Q11 – And when did you want to see or speak to them? (On the same day, on the next working day) <ul style="list-style-type: none"> <li><input type="checkbox"/> On the same day</li> <li><input type="checkbox"/> On the next working day</li> </ul>                                                                                                                                                                                                                                                                                                                                   | Q12 – Were you able to get an appointment to see or speak to someone? <ul style="list-style-type: none"> <li><input type="checkbox"/> Yes</li> <li><input type="checkbox"/> Yes, but I had to call back closer to or on the day I wanted the appointment</li> <li><input type="checkbox"/> No ... Go to Q16</li> <li><input type="checkbox"/> Can't remember ... Go to Q18</li> </ul>     |

|                              |                                                                                                                                                                                                                                                                                             |                                                                                                                                                                                                                                                                           |
|------------------------------|---------------------------------------------------------------------------------------------------------------------------------------------------------------------------------------------------------------------------------------------------------------------------------------------|---------------------------------------------------------------------------------------------------------------------------------------------------------------------------------------------------------------------------------------------------------------------------|
|                              | <ul style="list-style-type: none"><li><input checked="" type="checkbox"/> A few days later</li><li><input checked="" type="checkbox"/> A week or more later</li><li><input type="checkbox"/> I didn't have a specific day in mind</li><li><input type="checkbox"/> Can't remember</li></ul> |                                                                                                                                                                                                                                                                           |
| Convenience of opening hours |                                                                                                                                                                                                                                                                                             | <p>Q26: Is your GP surgery currently open at time that are convenient for you?</p> <ul style="list-style-type: none"><li><input type="checkbox"/> Yes ... Go to Q28</li><li><input type="checkbox"/> No → Q27</li><li><input type="checkbox"/> Don't know → Q27</li></ul> |
