# Supplementary material for: Do difficulties in accessing in-hours primary care predict higher use of out-of-hours GP services? Evidence from an English National Patient Survey
Source: PubMed Central journal article supplement — Emerg Med J. 2014 May 21;32(5):373–8. doi: 10.1136/emermed-2013-203451 (PMC4413677; doi:10.1136/emermed-2013-203451), 2014-05-21
Supplement: emermed-2013-203451-s2.pdf [file emermed-2013-203451-s2.pdf]

## Appendix 2: Coding of socio-demographic variables

| Variable  | Question & Responses                                                                                                                                                                                                                                                                                                                                                                                                                                                                                                                                                                                                                                                                                                                                                                                                                                                                                                             |  | Coded responses                  |
|-----------|----------------------------------------------------------------------------------------------------------------------------------------------------------------------------------------------------------------------------------------------------------------------------------------------------------------------------------------------------------------------------------------------------------------------------------------------------------------------------------------------------------------------------------------------------------------------------------------------------------------------------------------------------------------------------------------------------------------------------------------------------------------------------------------------------------------------------------------------------------------------------------------------------------------------------------|--|----------------------------------|
| Gender    | Q47: Are you male or female?<br><input type="checkbox"/> Male<br><input type="checkbox"/> Female                                                                                                                                                                                                                                                                                                                                                                                                                                                                                                                                                                                                                                                                                                                                                                                                                                 |  | As per question                  |
| Age       | Q48: How old are you?<br><input type="checkbox"/> Under 18<br><input type="checkbox"/> 18 to 24<br><input type="checkbox"/> 25 to 34<br><input type="checkbox"/> 35 to 44<br><input type="checkbox"/> 45 to 54<br><input type="checkbox"/> 55 to 64<br><input type="checkbox"/> 65 to 74<br><input type="checkbox"/> 75 to 84<br><input type="checkbox"/> 85 or over                                                                                                                                                                                                                                                                                                                                                                                                                                                                                                                                                             |  | As per question                  |
| Ethnicity | Q49: What is ethnic group?<br>A. White<br><input type="checkbox"/> English/ Welsh/ Scottish/ Northern Irish/ British<br><input type="checkbox"/> Irish<br><input type="checkbox"/> Gypsy or Irish Traveller<br><input type="checkbox"/> Any other White background → please write in box<br>B. Mixed/ multiple ethnic groups<br><input type="checkbox"/> White and Black Carribean<br><input type="checkbox"/> White and Black African<br><input type="checkbox"/> White and Asian<br><input type="checkbox"/> Any other Mixed/ multiple ethnic background → please write in box<br>C. Asian/ Asian British<br><input type="checkbox"/> Indian<br><input type="checkbox"/> Pakistani<br><input type="checkbox"/> Bangladeshi<br><input type="checkbox"/> Chinese<br><input type="checkbox"/> Any other Asian background → please write in box<br>D. Black/ African/ Carribean/ Black British<br><input type="checkbox"/> African |  | In groups A to E as per question |

|                   |                                                                                                                                                                                                                                                                                                                                                                                                                                                                                                                                                                                                                                                                                                                                                                                                                                                                                                                                                                                                                                                                                                                                                                           |  |                                                                                                      |
|-------------------|---------------------------------------------------------------------------------------------------------------------------------------------------------------------------------------------------------------------------------------------------------------------------------------------------------------------------------------------------------------------------------------------------------------------------------------------------------------------------------------------------------------------------------------------------------------------------------------------------------------------------------------------------------------------------------------------------------------------------------------------------------------------------------------------------------------------------------------------------------------------------------------------------------------------------------------------------------------------------------------------------------------------------------------------------------------------------------------------------------------------------------------------------------------------------|--|------------------------------------------------------------------------------------------------------|
|                   | <input type="checkbox"/> Carribean<br><input type="checkbox"/> Any other Black/ African/ Carribean background<br>→ please write in box<br>E. Other ethnic group<br><input type="checkbox"/> Arab<br><input type="checkbox"/> Any other ethnic group → please write in box                                                                                                                                                                                                                                                                                                                                                                                                                                                                                                                                                                                                                                                                                                                                                                                                                                                                                                 |  |                                                                                                      |
| Chronic condition | Q31: Which, if any, of the following medical conditions do you have?<br>Please x all the boxes that apply to you<br><input type="checkbox"/> Alzheimer's disease or dementia<br><input type="checkbox"/> Angina or long-term heart problem<br><input type="checkbox"/> Arthritis or long-term joint problem<br><input type="checkbox"/> Asthma or long-term chest problem<br><input type="checkbox"/> Blindness or severe visual impairment<br><input type="checkbox"/> Cancer in the last 5 years<br><input type="checkbox"/> Deafness or severe hearing impairment<br><input type="checkbox"/> Diabetes<br><input type="checkbox"/> Epilepsy<br><input type="checkbox"/> High blood pressure<br><input type="checkbox"/> Kidney or liver disease<br><input type="checkbox"/> Learning difficulty<br><input type="checkbox"/> Long-term back problem<br><input type="checkbox"/> Long term mental health problem<br><input type="checkbox"/> Long-term neurological problem<br><input type="checkbox"/> Another long-term condition<br><input type="checkbox"/> None of these conditions... Go to Q33<br><input type="checkbox"/> I would prefer not to say... Go to Q33 |  | <input type="checkbox"/> YES<br><br><input type="checkbox"/> NO<br><input type="checkbox"/> Excluded |

|                          |                                                                                                                                                                                                                                                                                                                                                                                                                                                                                                                                                                                                                                                                                                                                             |                                                                                                                                                                                                                                                                 |                                                                                                                                                                                                                                                                                                                                                                                                                                              |
|--------------------------|---------------------------------------------------------------------------------------------------------------------------------------------------------------------------------------------------------------------------------------------------------------------------------------------------------------------------------------------------------------------------------------------------------------------------------------------------------------------------------------------------------------------------------------------------------------------------------------------------------------------------------------------------------------------------------------------------------------------------------------------|-----------------------------------------------------------------------------------------------------------------------------------------------------------------------------------------------------------------------------------------------------------------|----------------------------------------------------------------------------------------------------------------------------------------------------------------------------------------------------------------------------------------------------------------------------------------------------------------------------------------------------------------------------------------------------------------------------------------------|
| <p>Employment status</p> | <p>Q50: Which one of these best describes what you are doing at present?<br/>If more than one of these applies to you, please x the main ONE only</p> <ul style="list-style-type: none"> <li><input type="checkbox"/> Full-time paid work (30 hours or more each week)</li> <li><input type="checkbox"/> Part-time paid work (under 30 hours)</li> <br/> <li><input type="checkbox"/> Full-time education at school, college or university</li> <li><input type="checkbox"/> Unemployed</li> <li><input type="checkbox"/> Permanently sick or disabled</li> <li><input type="checkbox"/> Fully retired from work</li> <li><input type="checkbox"/> Looking after the home</li> <li><input type="checkbox"/> Doing something else</li> </ul> | <p>Q52: If you need to see a GP at your GP surgery during your typical working hours, can you take time away from your work to do this?</p> <ul style="list-style-type: none"> <li><input type="checkbox"/> Yes</li> <li><input type="checkbox"/> No</li> </ul> | <ul style="list-style-type: none"> <li><input type="checkbox"/> Full time able to take time off work</li> <li><input type="checkbox"/> Full time unable to take time off work</li> <li><input type="checkbox"/> Part time able to take time off work</li> <li><input type="checkbox"/> Part time unable to take time off work</li> <br/> <li><input type="checkbox"/> Full time education</li> <li><input type="checkbox"/> Other</li> </ul> |
|--------------------------|---------------------------------------------------------------------------------------------------------------------------------------------------------------------------------------------------------------------------------------------------------------------------------------------------------------------------------------------------------------------------------------------------------------------------------------------------------------------------------------------------------------------------------------------------------------------------------------------------------------------------------------------------------------------------------------------------------------------------------------------|-----------------------------------------------------------------------------------------------------------------------------------------------------------------------------------------------------------------------------------------------------------------|----------------------------------------------------------------------------------------------------------------------------------------------------------------------------------------------------------------------------------------------------------------------------------------------------------------------------------------------------------------------------------------------------------------------------------------------|
